# Supplementary material
Source: Springer Nature journal article supplement (https://www.springermedizin.de/resource/supplementary/12968_2013_3337_MOESM8_ESM.pdf/9583652)

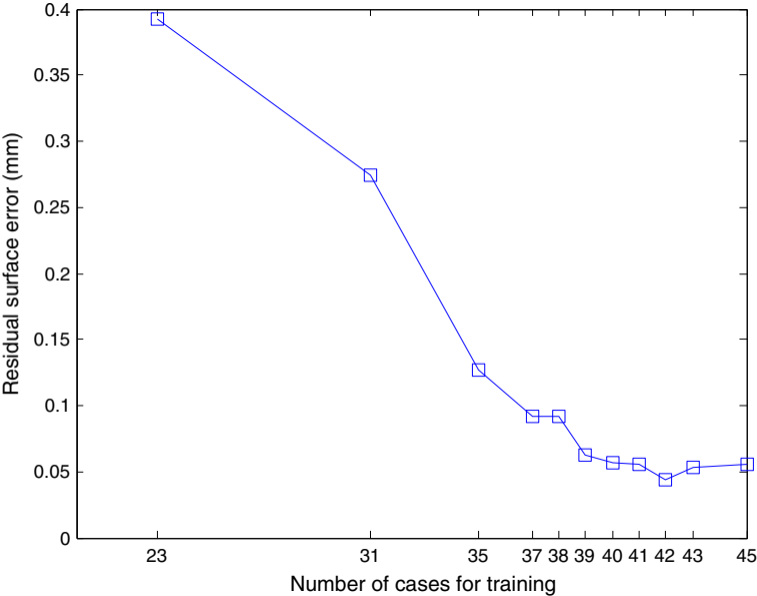

Supplement: MOESM8 [file 9583652]
